# Supplementary material for: Adolescent inpatient activity 1999–2010: analysis of English Hospital Episode Statistics data
Source: PubMed Central journal article supplement — Arch Dis Child. 2014 May 1;99(9):830–3. doi: 10.1136/archdischild-2013-305559 (PMC4145459; doi:10.1136/archdischild-2013-305559), 2014-05-01
Supplement: archdischild-2013-305559-s1.pdf [file archdischild-2013-305559-s1.pdf]

Appendix A. Trends in inpatient activity by disease category (England, 1999/2000 - 2010/11)

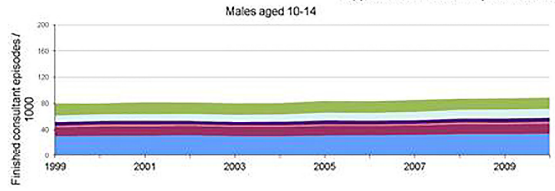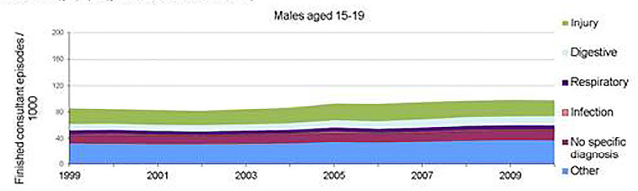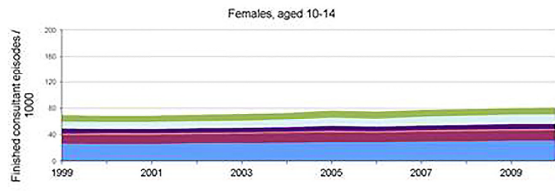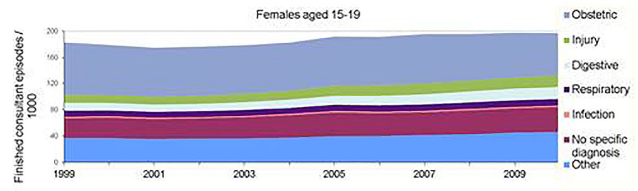

## Appendix B. Adolescent inpatient episodes/1000 and % change in England, 1999/2000 – 2010/11

| ICD 10 Chapter                                                                                                 | Male                |             | Female              |             |
|----------------------------------------------------------------------------------------------------------------|---------------------|-------------|---------------------|-------------|
|                                                                                                                | Episodes<br>2010/11 | %<br>change | Episodes<br>2010/11 | %<br>change |
| I. Certain infectious and parasitic diseases                                                                   | 1.9                 | 11.5        | 2.0                 | 12.8        |
| II. Neoplasms                                                                                                  | 4.9                 | 7.6         | 4.7                 | 5.5         |
| III. Diseases of the Blood and Blood-Forming<br>Organs and Certain Disorders involving the<br>Immune Mechanism | 2.3                 | 18.7        | 2.0                 | 45.2        |
| IV. Endocrine, Nutritional, and Metabolic Diseases                                                             | 3.0                 | 61.9        | 3.8                 | 68.0        |
| V. Mental and Behavioural Disorders                                                                            | 2.0                 | -40.4       | 2.5                 | -17.8       |
| VI. Diseases of the Nervous System                                                                             | 2.6                 | 51.8        | 2.8                 | 58.9        |
| VII. Diseases of the Eye and Adnexa                                                                            | 1.0                 | 13.3        | 1.4                 | 24.4        |
| VIII. Diseases of the Ear and Mastoid Process                                                                  | 1.5                 | -25.6       | 1.5                 | -22.3       |
| IX. Diseases of the Circulatory System                                                                         | 1.3                 | 32.8        | 1.2                 | 38.4        |
| X. Diseases of the Respiratory System                                                                          | 6.8                 | 6.4         | 8.9                 | 1.0         |
| XI. Diseases of the Digestive System                                                                           | 13.8                | 39.8        | 16.3                | 48.0        |
| XII. Diseases of the Skin and Subcutaneous<br>Tissue                                                           | 3.0                 | -11.4       | 3.1                 | -3.1        |
| XIII. Diseases of the Musculoskeletal System and<br>Connective Tissue                                          | 5.3                 | 34.1        | 6.4                 | 44.5        |
| XIV. Diseases of the Genitourinary System                                                                      | 5.9                 | 38.1        | 7.0                 | 31.1        |
| XV. Pregnancy, Childbirth, and the Puerperium                                                                  | 0.0                 | 0.0         | 34.4                | -13.3       |
| XVI. Certain Conditions Originating in the<br>Perinatal Period                                                 | 0.0                 | -37.7       | 0.0                 | -45.3       |
| XVII. Congenital Malformations, Deformations and<br>Chromosomal Abnormalities                                  | 2.7                 | 17.3        | 2.4                 | 28.5        |
| XVIII. Symptoms, Signs and Abnormal Clinical<br>and Laboratory Findings not elsewhere classified               | 10.5                | 28.0        | 18.0                | 29.9        |
| XIX. Injury, Poisoning and Certain Other<br>Consequences of External Causes                                    | 20.6                | -1.7        | 14.0                | 25.2        |
| XXI. Factors Influencing Health Status and<br>Contact with Health Services                                     | 4.6                 | 0.2         | 9.4                 | 24.8        |
| Total                                                                                                          | 93.7                | 13.0        | 141.8               | 13.0        |

**Appendix C. Percentage change in adolescent inpatient activity per thousand between 1999/2000 and 2010/11 by admitting speciality, England.**

|                             | FCEs by admitting speciality in 2010 | FCEs in 2010 compared to 1999 |
|-----------------------------|--------------------------------------|-------------------------------|
|                             | (% of total)                         | (% change)                    |
| Paediatrics                 | 20.2                                 | +47.5                         |
| Obstetrics/Gynaecology      | 18.2                                 | -12.1                         |
| A & E                       | 4.8                                  | +317.0                        |
| Adult medicine              | 5.8                                  | +15.1                         |
| General surgery             | 8.8                                  | -5.0                          |
| Orthopaedics                | 9.2                                  | -6.9                          |
| ENT                         | 6.0                                  | -22.3                         |
| Oral & Dental Surgery       | 6.1                                  | +30.7                         |
| Plastic Surgery             | 3.0                                  | +6.8                          |
| Paediatrics Surgery         | 2.2                                  | +23.2                         |
| CAMHS/Learning Difficulties | 1.8                                  | -38.0                         |
| Other                       | 14.0                                 | +12.2                         |
| Total                       | 100.0                                | +12.8%                        |

Notes

- Paediatrics includes all care coded as Paediatrics, excluding Paediatric Cardiology and Paediatric Neurology which are coded separately.
- Obstetrics and Gynaecology includes all care coded under Obstetrics, Gynaecology and Midwife Episode.
- Adult medicine includes episodes coded under General Medicine, but excludes medical subspecialities.
- Oral and dental surgery includes episodes coded as oral surgery or dentistry
- CAMHS/LD includes all episodes coded under Child/Adolescent Psychiatry, Learning Difficulties, and Mental Illness.
